# Supplementary material for: A novel biosensor for quantitative monitoring of on-target activity of paclitaxel
Source: Royal Society of Chemistry journal article supplement (doi:10.1039/c4nr01105h), 2014-12-08
Supplement: c4nr01105h1.pdf [file c4nr01105h1.pdf]

Supplementary figure

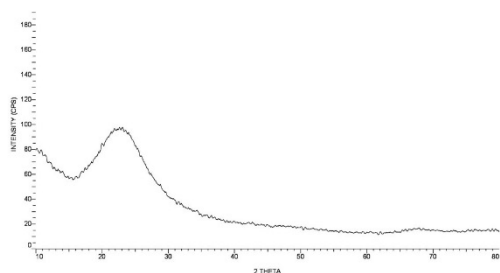

**Figure S1:** XRD spectrum illustrating the amorphous nature of the mesoporous silica nanoparticles
